# Supplementary material for: Having a Same Type IIS Enzyme’s Restriction Site on Guide RNA Sequence Does Not Affect Golden Gate (GG) Cloning and Subsequent CRISPR/Cas Mutagenesis
Source: MDPI journal article supplement (doi:10.3390/ijms23094889), 2022-04-28
Supplement: s1 [file s1]

## Online Supplement

### Supplement S1.1: Golden Gate (GG) reactions

**Step 1 (First GG reaction):** Integration of target site into modular vector system

#### GG reaction 1a for 1<sup>st</sup> gRNA

|        |                                                                                    |
|--------|------------------------------------------------------------------------------------|
| 1 µL   | pFH103 (adjusted to 100 ng/µL)                                                     |
| 1 µL   | AGAT (N) <sub>23</sub> Overhangs oligos (Forward primer -10 µM)                    |
| 1 µL   | AAAA (N) <sub>23</sub> reverse complement Overhangs oligos (Reverse primer -10 µM) |
| 1.5 µL | 10x T4 DNA Ligase buffer (New England Biolabs)                                     |
| 1.5 µL | BSA (1 mg/mL, New England Biolabs)                                                 |
| 1 µL   | BpiI (1 mg/mL, New England Biolabs)                                                |
| 1 µL   | T4 DNA Ligase (400000 U/µL, New England Biolabs)                                   |
| 7 µL   | ddH <sub>2</sub> O (adjust final volume to 15 µL)                                  |

*GG reaction 1b, 1c and 1d for 2<sup>nd</sup> gRNA, 3<sup>rd</sup> gRNA and 4<sup>th</sup> gRNA respectively. Here the only difference will be the 20/23 bp gRNA sequence according to our choice.*

**Step 2 (Second GG reaction):** Assembly of transcriptional units for gRNA expression and nuclease expression

#### GG reaction 2a (for 1<sup>st</sup> gRNA, Position 3 at L2 construct)

|        |                                                                     |
|--------|---------------------------------------------------------------------|
| 1 µL   | pICH47751 (adjusted to 100 ng/µL)                                   |
| 1 µL   | pFH35 (adjusted to 100 ng/µL)                                       |
| 1 µL   | pFH103a (adjusted to 100 ng/µL), I put “a” for 1 <sup>st</sup> gRNA |
| 1.5 µL | 10x T4 DNA Ligase buffer (New England Biolabs)                      |
| 1.5 µL | BSA (1 mg/mL, New England Biolabs)                                  |
| 1 µL   | BsaI (1 mg/mL, New England Biolabs)                                 |
| 1 µL   | T4 DNA Ligase (400000 U/µL, New England Biolabs)                    |
| 7 µL   | ddH <sub>2</sub> O (adjust final volume to 15 µL)                   |

#### GG reaction 2b (for 2<sup>nd</sup> gRNA, Position 4 at L2 construct)

|        |                                                                     |
|--------|---------------------------------------------------------------------|
| 1 µL   | pICH47761 (adjusted to 100 ng/µL)                                   |
| 1 µL   | pFH35 (adjusted to 100 ng/µL)                                       |
| 1 µL   | pFH103b (adjusted to 100 ng/µL), I put “b” for 2 <sup>nd</sup> gRNA |
| 1.5 µL | 10x T4 DNA Ligase buffer (New England Biolabs)                      |
| 1.5 µL | BSA (1 mg/mL, New England Biolabs)                                  |
| 1 µL   | BsaI (1 mg/mL, New England Biolabs)                                 |
| 1 µL   | T4 DNA Ligase (400000 U/µL, New England Biolabs)                    |
| 7 µL   | ddH <sub>2</sub> O (adjust final volume to 15 µL)                   |

#### GG reaction 2c (for 3<sup>rd</sup> gRNA, Position 5 at L2 construct)

|        |                                                                     |
|--------|---------------------------------------------------------------------|
| 1 µL   | pICH47772 (adjusted to 100 ng/µL)                                   |
| 1 µL   | pFH35 (adjusted to 100 ng/µL)                                       |
| 1 µL   | pFH103c (adjusted to 100 ng/µL), I put “c” for 3 <sup>rd</sup> gRNA |
| 1.5 µL | 10x T4 DNA Ligase buffer (New England Biolabs)                      |

|        |                                                   |
|--------|---------------------------------------------------|
| 1.5 µL | BSA (1 mg/mL, New England Biolabs)                |
| 1 µL   | Bsa1 (1 mg/mL, New England Biolabs)               |
| 1 µL   | T4 DNA Ligase (400000 U/µL, New England Biolabs)  |
| 7 µL   | ddH <sub>2</sub> O (adjust final volume to 15 µL) |

**GG reaction 2d (for 4<sup>th</sup> gRNA, Position 6 at L2 construct)**

|        |                                                                     |
|--------|---------------------------------------------------------------------|
| 1 µL   | pICH47781 (adjusted to 100 ng/µL)                                   |
| 1 µL   | pFH35 (adjusted to 100 ng/µL)                                       |
| 1 µL   | pFH103d (adjusted to 100 ng/µL), I put “d” for 4 <sup>th</sup> gRNA |
| 1.5 µL | 10x T4 DNA Ligase buffer (New England Biolabs)                      |
| 1.5 µL | BSA (1 mg/mL, New England Biolabs)                                  |
| 1 µL   | Bsa1 (1 mg/mL, New England Biolabs)                                 |
| 1 µL   | T4 DNA Ligase (400000 U/µL, New England Biolabs)                    |
| 7 µL   | ddH <sub>2</sub> O (adjust final volume to 15 µL)                   |

**Step 3: (Third GG reaction) Assembly of multigene construct**

|        |                                                                  |
|--------|------------------------------------------------------------------|
| 1 µL   | L2 backbone -pICSL4723 (adjusted to 100 ng/µL)                   |
| 1 µL   | BAR marker cascade, pICSL11017 (adjusted to 100 ng/µL)           |
| 1 µL   | LbCas 12a nuclease cascade, pEPOR1CB0013 (adjusted to 100 ng/µL) |
| 1 µL   | End-linker - pICH41822, for 4 gRNAs                              |
| 1 µL   | pICH47751 for 1 <sup>st</sup> gRNA                               |
| 1 µL   | pICH47761 for 2 <sup>nd</sup> gRNA                               |
| 1 µL   | pICH47772 for 3 <sup>rd</sup> gRNA                               |
| 1 µL   | pICH47781 for 4 <sup>th</sup> gRNA                               |
| 1.5 µL | 10x T4 DNA Ligase buffer (New England Biolabs)                   |
| 1.5 µL | BSA (1 mg/mL, New England Biolabs)                               |
| 1 µL   | BpiI (1 mg/mL, New England Biolabs)                              |
| 1 µL   | T4 DNA Ligase (400000 U/µL, New England Biolabs)                 |
| 2 µL   | ddH <sub>2</sub> O (adjust final volume to 15 µL)                |

**Supplement S1.2: GG reaction condition**

|       |       |       |
|-------|-------|-------|
| 37 °C | 20 s  | } 50x |
| 37 °C | 3 min |       |
| 16 °C | 4 min |       |
| 50 °C | 5 min |       |
| 80 °C | 5 min |       |
| 4 °C  | store |       |

**Supplement S2:** Configuration of vector elements between LB and RB of Ti plasmid

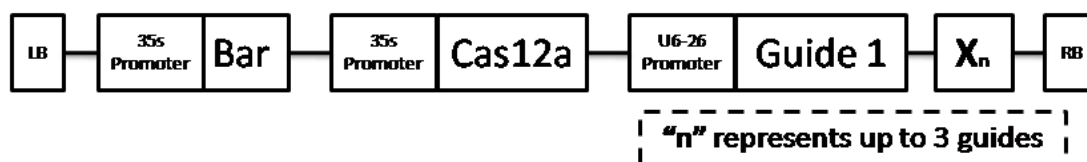

**Supplement S3:** Primers used in this study

| Name         | Type               | Sequence (5'-3')                                               |
|--------------|--------------------|----------------------------------------------------------------|
| FH32         | Sequencing         | GCAATGTAACATCAGAGATTTTGA                                       |
| Lvl1_R(0230) | Sequencing         | CTGGTGGCAGGATATATTGTGGTG                                       |
| MOg2         | Sequencing         | TTACGAATTCCCATGGGGA                                            |
| MoACD2       | PCR and Sequencing | Forward: AAACCTTTCACGGCGAAGC<br>Reverse: CACACTGATTAGCCAGATTCC |

**Supplement S4:** DNA sequences of CRISPR/Cas12a final vector

>gaacactctgtgccgaattcggatccggagcggagaattaagggagtcacgttatgacccccgc  
cgatgacgcgggacaagccgttttacgtttggaactgacagaaccgcaacgttgaaggagccact  
cagccgcgggtttctggagttaatgagctaagcacatacgtcagaaaccattattgcgcgttca  
aaagtgcctaaggctcactatcagctagcaaataatttcttgtcaaaatgctccactgacgttcca  
taaattcccctcggatccaattagagtctcatattcactctcaatccaaataatctgcaccgga  
tctggatcgtttcgcatgtctcctgaaagaaggcctgctgatattagaagggctactgaggctga  
tatgcctgctgtgtgcactattgtgaatcattacattgagacttctactgtgaatttcaggactg  
agcctcaagaaccacaagagtggactgatgatcttgtgaggcttagagagagggtatccttggctt  
gttgcctgaagtggatgggtgaagtggctggattgtcttatgctggctccttggaaaggctaggaatgc  
ttacgattggactgctgagtctactgtttacgtgtctcctaggtcatcaaagaactgggtcttggat  
ctactctttacactcatcttttgaagtctttggaggctcagggtttcaagtctgtggttgctgtg  
attggacttcctaataatgatccttctgtgaggatgcatgaggctccttgggttatgctcctaggggat  
gcttagagctgctgggtttcaaacaatggaaattggcatgatgtgggattctggcagcttgatttct  
ctcttctgtttcctcctagacctgttcttctgtgactgagatttgagcgggactctggatctag  
agtcaagcagatcggttcaaacaatttggcaataaagtttcttaagattgaatcctgttgccggtct  
tgcatgatattatcatataatttctgttggaattacgttaagcatgtaataattaacatgtaatgca  
tgacgttatattatgagatgggtttttatgattagagtcccgcaattatacatttaatacgcgata  
gaaaacaaaatatagcgcgcaaaactaggataaattatcgcgcgcggtgtcatctatgttactaga  
tcgacgcttgctgaattggagcgtgcaagaattcaagcttggagggtcaacatgggtggagcacga  
cactctgggtctactccaaaaatgtcaaagatacagctctcagaagatcaaagggtcattgagactt  
ttcaacaaaggataatttcgggaaacctcctcggtattccattgcccagctatctgtcacttcac  
gaaaggacagtagaaaaggaaggtggctcctacaaatgccatcattgcgataaaggaaaggctat  
cattcaagatctctctgcccagacagtgggtcccaaagatggacccccaccacgaggagcatcgtgg  
aaaaagaagaggttccaaccacgtctacaaagcaagtggattgatgtgataacatgggtggagcac  
gacactctgggtctactccaaaaatgtcaaagatacagctctcagaagatcaaagggtcattgagac  
ttttcaacaaaggataatttcgggaaacctcctcggtattccattgcccagctatctgtcacttca  
tcgaaaggacagtagaaaaggaaggtggctcctacaaatgccatcattgcgataaaggaaaggct

atcattcaagatctctctgcccacagtgggtcccaaagatggacccccacccacgaggagcatcgt  
ggaaaaagaagaggttccaaccacgtctacaaagcaagtggattgatgtgacatctccactgacg  
taagggatgacgcacaatcccactatccttcgcaagacccttcctctatataaggaagttcattt  
catttgagaggacacgctcgagtataagagctcatttttacaacaattaccaacaacaacaac  
aacaacaacattacaattacatttacaattatcgatacaatgagcaagctggagaagtttaca  
actgctactccctgtctaaagaccctgaggttcaaggccatccctgtgggcaagaccaggagaac  
atcgacaataagcggctgctggaggagcagaagagagccgaggattataagggcgtaagaa  
gctgctggatcgctactatctgtcttttatcaacgacgtgctgcacagcatcaagctgaagaatc  
tgaacaattacatcagcctgttccggaagaaaaccagaaccgagaaggagaataaggagctggag  
aacctggagatcaatctgcggaaggagatcgccaaggccttcaagggcaacgagggctacaagtc  
cctgtttaagaaggatatcatcgagacaatcctgccagagtctcctggacgataaggacgagatcg  
ccctgggtgaacagcttcaatggctttaccacagccttcaccggcttctttgataacagagagaat  
atgttttccgaggaggccaagagcacatccatcgccctcaggtgtatcaacgagaatctgacccg  
ctacatctctaatatggacatcttcgagaagggtggacgccatctttgataagcacgaggtgcagg  
agatcaaggagaagatcctgaacagcgactatgatgtggaggatttctttgagggcgagttcttt  
aactttgtgctgacacaggagggcatcgacgtgtataacgccatcatcggcggtctcgtgaccga  
gagcggcgagaagatcaagggcctgaacgagtacatcaacctgtataatcagaaaaccaagcaga  
agctgcctaagtttaagccactgtataagcaggtgctgagcgatcgggagtctctgagcttctac  
ggcgagggtatacatccgatgaggaggtgctggaggtgtttagaaacaccctgaacaagaacag  
cgagatcttcagctccatcaagaagctggagaagctgttcaagaattttgacgagtactctagcg  
ccggcatctttgtgaagaacggccccgccatcagcacaatctccaaggatatcttcggcgagtgg  
aacgtgatccgggacaagtggaatgccgagtatgacgatatccacctgaagaagaaggccgtggt  
gaccgagaagtacgaggacgatcggagaaagtccttcaagaagatcggctccttttctctggagc  
agctgcaggagtacgccgacgccgatctgtctgtgggtggagaagctgaaggagatcatcatccag  
aaggtggatgagatctacaaggtgtatggctcctctgagaagctgttcgacgccgattttgtgct  
ggagaagagcctgaagaagaacgacgccgtgggtggccatcatgaaggacctgctggattctgtga  
agagcttcgagaattacatcaaggccttctttggcgagggaaggagacaaacagggacgagtc  
ttctatggcgattttgtgctggcctacgacatcctgctgaaggtggaccacatctacgatgccat  
ccgcaattatgtgacccagaagccctactctaaggataagttcaagctgtattttcagaaccctc  
agttcatggcggtgggacaaggataaggagacagactatcgggccaccatcctgagatacggc  
tccaagtactatctggccatcatggataagaagtacgccaaagtgcctgcagaagatcgacaagga  
cgatgtgaacggcaattacgagaagatcaactataagctgctgcccggccctaataagatgctgc  
caaaggtgttcttttctaagaagtggatggcctactataaccccagcaggacatccagaagatc  
tacaagaatggcacattcaagaagggcgatatgtttaacctgaatgactgtcacaagctgatcga  
cttctttaaggatagcatctcccggatatccaaagtggtccaatgcctacgattttcaacttttctg  
agacagagaagtataaggacatcgccggcttttacagagaggtggaggagcagggctataaggtg  
agcttcgagctctgccagcaagaaggaggtggataagctgggtggaggagggcaagctgtatatgtt  
ccagatctataacaaggacttttccgataagtctcacggcacaccaatctgcacaccatgtact  
tcaagctgctgtttgacgagaacaatcacggacagatcaggctgagcggaggagcagagctgttc  
atgaggcgcgccctcctgaagaaggaggagctgggtgggtgcaccagccaactcccctatcgccaa  
caagaatccagataatcccaagaaaaccacaacctgtcctacgacgtgtataaggataagaggt  
tttctgaggaccagtagcagctgcacatcccaatcgccatcaataagtgccccagaacatcttc  
aagatcaatacagaggtgcgcgtgctgctgaagcacgacgataacccctatgtgatcggcatcga  
taggggagcgcgaatctgctgtatatcgtgggtgggtggacggcaagggcaacatcgtggagcagt

attccctgaacgagatcatcaacaacttcaacggcatcaggatcaagacagattaccactctctg  
ctggacaagaaggagaaggagaggttcgaggcccgccagaactggacctccatcgagaatatcaa  
ggagctgaaggccggctatatctctcaggtggtgcacaagatctgcgagctggtggagaagtacg  
atgccgtgatcgccctggaggacctgaactctggctttaagaatagccgctgaaggtggagaag  
caggtgtatcagaagttcgagaagatgctgatcgataagctgaactacatggtggacaagaagtc  
taatccttgtgcaacaggcgccctgaagggctatcagatcaccaataagttcgagagcttta  
agtccatgtctaccagaacggcttcatcttttacatccctgcctggctgacatccaagatcgat  
ccatctaccggctttgtgaacctgctgaaaaccaagtataaccagcatcgccgattccaagaagtt  
catcagctcctttgacaggatcatgtacgtgcccaggaggatctgttcgagtttgccctggact  
ataagaacttctctcgacagacgccgattacatcaagaagtggagctgtactcctacggcaac  
cggatcagaatcttcggaatcctaagaagaacaacgtgttcgactgggaggaggtgtgcctgac  
cagcgctataaggagctgttcaacaagtacggcatcaattatcagcagggcgatatcagagccc  
tgctgtgcgagcagtcgacaaggccttctactctagctttatggccctgatgagcctgatgctg  
cagatgcggaacagcatcacaggccgcaccgacgtggattttctgatcagccctgtgaagaactc  
cgacggcatcttctacgatagccggaactatgaggccaggagaatgccatcctgccaagaacg  
ccgacgccaatggcgccctataacatcgccagaaagggtgctgtgggccatcggccagttcaagaag  
gccgaggacgagaagctggataagggtgaagatcgccatctctaacaaggagtggctggagtacgc  
ccagaccagcgtgaagcacaaaaggccggcgccacgaaaaaggccggccaggcaaaaaagaaaa  
agggatcctaccatacgatgttccagattacgcttatccctacgacgtgcctgattatgcatac  
ccatatgatgtccccgactatgcctaagcttgtcaagcagatcgttcaaacatttggaataaag  
tttcttaagattgaatcctgttgccggtcttgcgatgattatcatataatttctgttgaattacg  
ttaagcatgtaataattaacatgtaatgcatgacgttatttatgagatgggtttttatgattaga  
gtccccgaattatacattttaatacgcgatagaaaacaaaatatagcgcgcaaactaggataaatt  
atcgcgcgcggtgtcatctatgttactagatcgacgctactagaattcgagctcggagaagcttc  
gttgaacaacggaaactcgacttgccttcgcacaatacatcatttcttcttagcttttttctt  
cttcttcgttcatacagttttttttgtttatcagcttacatttcttgaaccgtagctttcgtt  
ttcttctttttaactttccattcgagtttttgtatcttgtttcatagtttgtcccaggattaga  
atgattaggcatcgaaccttcaagaatttgattgaataaaacatcttcattcttaagatatgaag  
ataatcttcaaaaggccccctgggaatctgaaagaagagaagcaggccccatttatatgggaaagaa  
caatagtatttcttatataggccccatttaagttgaaaacaatcttcaaaagtcccacatcgctta  
gataagaaaacgaagctgagtttatatacagctagagtcgaagtagtgattgtaatttctactaa  
gtgtagatcgcttcagctctctcatccatcttttttttcgctttacgaattcccatggggaga  
agcttcggtgaacaacggaaactcgacttgccttcgcacaatacatcatttcttcttagctttt  
tttcttcttcttcgttcatacagttttttttgtttatcagcttacatttcttgaaccgtagct  
ttcgttttTATGAAAGCACACGGTTGGATGActtctttttaactttccattcgagtttttgtat  
cttgtttcatagtttgtcccaggattagaatgattaggcatcgaaccttcaagaatttgattgaa  
taaaacatcttcattcttaagatatgaagataatcttcaaaaggccccctgggaatctgaaagaag  
agaagcaggccccatttatatgggaaagaacaatagtatttcttatataggccccatttaagttgaa  
aacaatcttcaaaagtcccacatcgcttagataagaaaacgaagctgagtttatatacagctaga  
gtcgaagtagtgattgtaatttctactaagtgtagattctccttcgagaccaagtcctcttttt  
tttctgctcagagaattcgcatgcggagaagcttcgttgaacaacggaaactcgacttgccttcc  
gcacaatacatcatttcttcttagctttttttcttcttcttcgttcatacagttttttttgttt  
atcagcttacatttcttgaaccgtagcttttcgttttcttctttttaactttccattcgagttt  
ttgtatcttgtttcatagtttgtcccaggattagaatgattaggcatcgaaccttcaagaatttg

attgaataaaacatcttcattcttaagatatgaagataatcttcaaaaggccctgggaatctga  
aagaagagaagcaggcccatatgatgggaaagaacaatagtatttcttatataggccatttaa  
gttgaaaacaatcttcaaaagtcccacatcgcttagataagaaaacgaagctgagtttatataca  
gctagagtcgaagtagtgattgtaatttctactaagtgtagat **tatgaaagcacacgggttgga**  
**a**tttttttttcgcttggtgaattcctcgagggagaagcttcgttgaacaacggaaactcgacttg  
ccttccgcacaatacatcatttcttcttagctttttttcttcttcttcttgcattacagtttttt  
ttgtttatcagcttacatttcttgaaccgtagctttcgttttcttcttttaactttccattcg  
gagtttttgatcttggttcatagtttgtcccaggattagaatgattaggcatcgaaaccttcaag  
aatttgattgaataaaacatcttcattcttaagatatgaagataatcttcaaaaggccctggga  
atctgaaagaagagaagcaggcccatatgatgggaaagaacaatagtatttcttatataggccc  
atttaagttgaaaacaatcttcaaaagtcccacatcgcttagataagaaaacgaagctgagttta  
tatacagctagagtcgaagtagtgattgtaatttctactaagtgtagatccagataagccttgct  
tgactccttttttttcgctgagcgaggatgcacatgtgaccgagggacacgaagtgatccggtt  
aaactatcagtggttgacaggatatattggcgggttaaaccctaagagaaaagagcggttattagaa  
taatcggatatttaaaagggcggtgaaaaggttatccgttcgtccatttgatgtgcatgccaac  
cacagggttccctcgggagtcagccgtgcggctgcatgaaatcctggcgggttgctgatgcc  
aagctggcggcctggccggccagcttgccgctgaagaaaccgagcgccgctctaaaagggtg  
atgtgtatttgagtaaaacagcttgctcatgcggtcgctgcgtatatgatgcgatgagtaata  
aacaatacgaaggggaacgcatgaaggttatcgctgtacttaaccagaaaggcggtcaggca  
agacgaccatcgcaaccatctagcccgcgccctgcaactcgccggggccgatgttctgttagtc  
gattccgatccccagggcagtgcccgcatggggcgccgtgcgggaagatcaaccgctaaccgt  
tgtcgcatcgaccgcccagcattgaccgcgacgtgaaggccatcgccggcgcgacttcgtag  
tgatcgacggagcgccccaggcgcgacttggtgtgtccgcgatcaaggcagccgacttcgtg  
ctgattccggtgcagccaagcccttacgacatatggggccaccgcccagcctggtggagctggttaa  
gcagcgcattgaggtcacggatggaaggctacaagcggccttgtcgtgtcgcgggcgatcaaag  
gcacgcgcatcgccggtgaggttgccgaggcgctggccgggtacgagctgcccattcttgagtcc  
cgtatcacgcagcgctgagctaccaggcactgcccggcgccgcacaaccgttcttgaatcaga  
acccgagggcgacgctgcccgcgaggtccaggcgctggccgctgaaattaaatcaaaactcattt  
gagttaatgaggtaaagagaaaatgagcaaaagcacaacacgctaagtgcgggccgtccgagcg  
cacgcagcagcaaggctgcaacgttgccagcctggcagacacgccagccatgaagcgggtcaac  
tttcagttgcccggcgaggatcacaccaagctgaagatgtacgcggtacgccaaggcaagaccat  
taccgagctgctatctgaatacatcgcgacgtaccagagtaaataagcaaatgaataaatgagt  
agatgaatttttagcggctaaaggaggcgccatggaaaatcaagaacaaccaggcaccgacgcgt  
ggaatgccccatgtgtggaggaaacgggcggttgccagggcgtgaagcggctgggttgctgcccgc  
cctgcaatggcactggaacccccaaagcccaggaatcggcgtgacggtcgaaaccatccggccc  
gggtacaaatcggcgcggcgctgggtgatgacctggtggagaagttgaaggccgcgagggccccc  
agcggcaacgcatcgaggcagaagcagccccgggtgaatcgtggcaagcggccgctgatcgaatc  
cgcaaagaatcccggcaaccgcccagccggtgcgcgctcgattaggaagccgcccgaaggcgga  
cgagcaaccagattttttcgttccgatgctctatgacgtgggcacccgcgatagtcgcagcatca  
tggaactggccgttttccgtctgtcgaagcgtgaccgacgagctggcgaggtgatccgctacgag  
cttccagacggggcagtagaggtttccgcagggccggccgcatggccagtgtgtgggattacga  
cctggtactgatggcggtttcccatctaaccgaatccatgaaccgataccgggaagggaaggag  
acaagcccggccgctgttccgtccacagttgcggacgtactcaagttctgccggcgagccgat  
ggcggaaagcagaaagacgacctggtagaaacctgcattcggttaaaccacgcacgcttgccat

gcagcgtacgaagaaggccaagaacggccgcctgggtgacggtatccgaggggtgaagccttgatta  
gccgctacaagatcgtaaagagcgaaaccggggcgccggagtacatcgagatcgagctagctgat  
tggatgtaccgcgagatcacagaaggcaagaaccgggacgtgctgacgggttcaccccgattactt  
tttgatcgatcccgcatcgccgtttttctctaccgcctggcacgcccgcgcgcaggcaaggcag  
aagccagatggttgttcaagacgatctacgaacgcagtggtgagcgccggagagttcaagaagttc  
tgtttcaccgtgcgcaagctgatcggtcaaattgacctgccggagtacgatttgaaggaggaggc  
ggggcaggctggcccgatcctagtcacgctaccgcaacctgatcgagggcggaagcatccgccg  
gttcctaattgtacggagcagatgctagggcaaattgccctagcaggggaaaaagggtcgaaaaagc  
ttctttcctgtggatagcacgtacattgggaacccaaagccgtacattgggaaccggaacccgta  
cattgggaacccaaagccgtacattgggaaccgggtcacacatgtaagtgactgatataaaagaga  
aaaaaggcgattttttccgcctaaaactctttaaaacttattaaaactcttaaaacccgcctggcc  
tgtgcataactgtctggccagcgcacagccgaacagctgcaaaaagcgcctacccttcggtcgct  
gcgctccctacgccccgcgcgttcgcgtcggcctatcgcgccgcgtggccgcctcaaaaatggctg  
gcctacggccaggcaatctaccagggcgcggaacagccgcgcgtcgccactcgaccgcccggcgc  
ccacatcaaggctccgagtgcgcggaacccctatttgtttatttttctaatacattcaaatatg  
tatccgctcatgagacaataaccctgataaatgcttcaataatattgaaaaaggaagagtatggc  
taaaatgagaatatcacccgaattgaaaaaactgatcgaaaaataccgctgcgtaaaagatacgg  
aaggaatgtctcctgctaagggtatataagctgggtgggagaaaaatgaaaacctatatttaaaatg  
acggacagccggtataaagggaccacctatgatgtggaacgggaaaaggacatgatgctatggct  
ggaaggaaaagctgcctgttccaaaggctcctgcactttgaacggcatgatggctggagcaatctgc  
tcatgagtgaggccgatggcgctcctttgctcgggaagagtatgaagatgaacaaagccctgaaaag  
attatcgagctgtatgcggagtgcacaggtcctttcactccatcgacatatcggattgtcccta  
tacgaatagcttagacagccgcttagccgaattggattacttactgaataacgatctggccgatg  
tggattgcaaaaactgggaagaggacactccatttaagatccgcgcgagctgtatgatttttta  
aagacggaaaagcccgaagaggaacttgtcttttcccacggcgacctgggagacagcaacatctt  
tgtgaaaagatggcaaagtaagtggctttattgatcttgggagaagcggcagggcggaacagtgg  
atgacattgccttctgcgtccggctcgctcagggaggatatcggggaagaacagtatgtcgagcta  
ttttttgacttactggggatcaagcctgattgggagaaaaataaaatattatattttactggatga  
attgttttagctgtcagaccaagtttactcatatatacttttagattgatttaaaacttcattttt  
aatttaaaaggatctaggtgaagatcctttttgataatctcatgacaaaaatcccttaacgtgag  
ttttcgttccactgagcgtcagaccccgtagaaaagatcaaaggatcttctttgagatcctttttt  
tctgcgcgtaatctgctgcttgcaacaaaaaaaaaccacgcctaccagcgggtggtttggttgccgg  
atcaagagctaccaactctttttccgaaggtaactggcttcagcagagcgcagataccaaatact  
gttcttctagtgtagccgtagttaggccaccacttcaagaactctgtagcaccgcctacatacct  
cgctctgctaactcctgttaccagtggctgctgccagtggtgataagtcgtgtcttaccgggttg  
actcaagacgatagttaccggataaggcgcagcggctcgggctgaacgggggggttcgtgcacacag  
cccagcttgagcgaacgacctacaccgaactgagatacctacagcgtgagctatgagaaagcgc  
cacgcttcccgaaggagaaaggcggacaggtatccggtaagcggcaggggtcggaacaggagagc  
gcacgagggagcttccagggggaaacgcctggatatctttatagtcctgtcgggtttcgccacctc  
tgacttgagcgtcgattttttgtgatgctcgtcagggggggcgagcctatggaaaaacgccagcaa  
cgcgccctttttacgggttctgctcggtatctgttggaaccggacagtagtcatggttgatgggctg  
cctgtatcgagtgggtgattttgtgccgagctgccggctcggggagctgttggtggctgggtggcag  
gatataattgtggtgtaaacaaattgacgcttagacaacttaataacacattgcggacgttttttaa  
tgtactgggggtt
